# Supplementary material
Source: PubMed Central journal article supplement (PMC6389772)

**Supplemental Material for:**

**Remodeling of Glycosaminoglycans During Differentiation of Adult Human Bone  
Mesenchymal Stromal Cells toward Hepatocytes**

Paiyz E. Mikael<sup>1</sup>, Charles Willard<sup>2</sup>, Aurvan Koyee<sup>3</sup>, Charmaine-Grace Barla<sup>4</sup>, Xinyue Liu<sup>1,2,5</sup>,  
Xiaorui Han<sup>5,1</sup>, Yilan Ouyang<sup>1</sup>, Ke Xia<sup>1</sup>, Robert J. Linhardt<sup>1,2,4,5</sup>, Jonathan S. Dordick<sup>1,2,4,5\*</sup>

<sup>1</sup>Center for Biotechnology and Interdisciplinary Studies, Rensselaer Polytechnic Institute, Troy NY

<sup>2</sup>Department of Chemical and Biological Engineering, Rensselaer Polytechnic Institute, Troy NY

<sup>3</sup>Department of Biology, University of Virginia, Charlottesville VA

<sup>4</sup>Department of Biochemistry and Biophysics, Rensselaer Polytechnic Institute, Troy NY

<sup>5</sup>Department of Chemistry and Chemical Biology, Rensselaer Polytechnic Institute, Troy NY

**Supplemental Figure 1.** Flow cytometry analysis of cultured human bone marrow mesenchymal stromal cells. This figure represents the positive hBMSC markers CD73, CD90, and CD105 at passage 5. Red lines indicate fluorescence of isotopic control, while the blue lines indicate the fluorescence signal of the specific antigen. Plots are depicted with % maximum on the y-axis, and fluorescence intensity for the indicated markers on the x-axis.

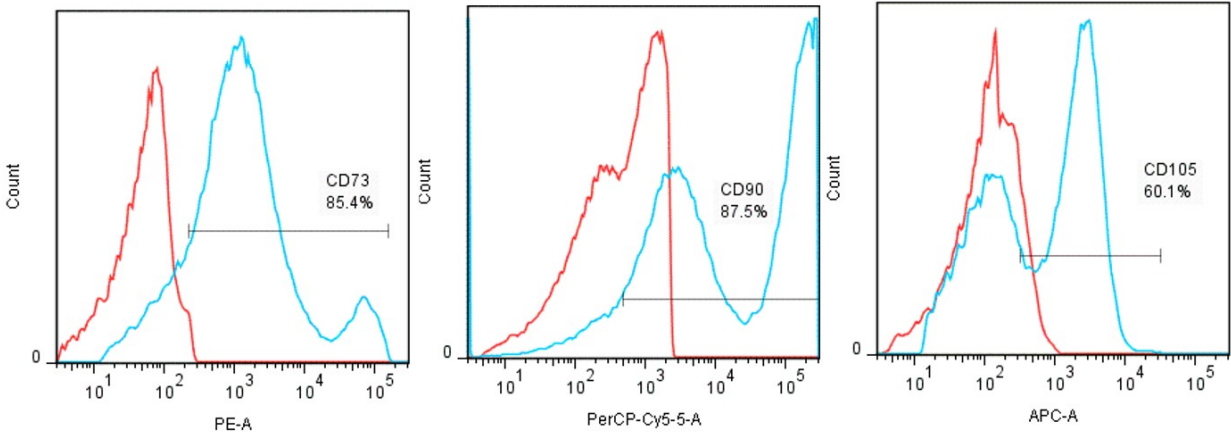

Supplement: Supp_Data.pdf [file Supp_Data.pdf]
